# Supplementary material for: New molecules candidates with semicarbazide scaffold – anticancer potential in view of research on their physicochemical properties and antioxidant activity
Source: Research Square preprint supplement (doi:10.21203/rs.3.rs-7455454/v1), 2025-09-10
Supplement: Supplementary file 1 [file a8e8069729d555ef4976febb.docx]

Table S1. Crystallographic parameters and refinement details for the target crystals

|  | **AW8** | **AW12** | **AW19** | **AW23** | **AW33** |
| --- | --- | --- | --- | --- | --- |
| Empirical formula | C14H10N3O2Cl3 | C14H10N3O2Cl3 | C14H11N4O4Cl | C18H14N3O2Cl | C14H18N3O2Cl |
| Formula weight | 358.60 | 358.60 | 334.72 | 339.77 | 295.76 |
| Crystal system | monoclinic | monoclinic | monoclinic | monoclinic | monoclinic |
| Space group | *P*21/*n* | *P*21/*c* | *C*2/*c* | *P*21/*c* | *P*21/*c* |
| *Unit cell paramaters* | | | | | |
| *a* (Å) | 9.1703(8) | 14.0356(10) | 30.0549(13) | 8.0560(9) | 9.3713(3) |
| *b* (Å) | 11.3613(12) | 14.9442(10) | 6.9324(2) | 7.6108(9) | 13.5104(4) |
| *c* (Å) | 15.1992(13) | 7.0371(5) | 14.4089(7) | 26.8092(19) | 12.0313(5) |
| *β* (o) | 106.479(9) | 92.118(7) | 97.938(4) | 95.629(8) | 102.815(4) |
| *V* (Å3) | 1518.5(3) | 1475.03(18) | 2973.4(2) | 1635.8(3) | 1485.34(9) |
| *Z* | 4 | 4 | 8 | 4 | 4 |
| *dcalc* (Mg m-3) | 1.569 | 1.615 | 1.495 | 1.380 | 1.323 |
| F(000) | 728 | 728 | 1376 | 704 | 624 |
| Absorption coefficient, *μ* (mm-1) | 0.612 | 5.725 | 2.533 | 2.199 | 2.326 |
| *T* (K) | 293 | 296 | 296 | 296 | 293 |
| Absorption correction | multi-scan methods[23] | | | | |
| *Tmin*/*Tmax* | 0.852/1.000 | 0.716/1.000 | 0.884/1.000 | 0.808/1.000 | 0.766/1.000 |
| Θ range for data collection (o) | 2.79–28.66 | 4.32–75.84 | 5.95–76.11 | 3.31–76.12 | 4.84–75.99 |
| No of measured reflections | 6340 | 10036 | 5525 | 3276 | 5774 |
| No of independent reflections | 3356 | 3030 | 3008 | 3276 | 3004 |
| No of observed reflections | 2529 with *I*>2*σ*(*I*) | 2585 with *I*>2*σ*(*I*) | 2579 with *I*>2*σ*(*I*) | 2139 with *I*>2*σ*(*I*) | 2495 with *I*>2*σ*(*I*) |
| *Refinement method* | | | | | |
| Final R indices: *R*, *wR*(*F*2) | 0.051/0.136 | 0.104/0.275 | 0.043/0.114 | 0.080/0.205 | 0.052/0.141 |
| Goodness-of-fit on *F*2, *S* | 1.077 | 1.183 | 1.055 | 1.059 | 1.043 |
| Data/parameters | 3356/267 | 3030/224 | 3008/217 | 3276/228 | 3004/190 |
| Extinction ceofficient | 0.008(2) | - | - | 0.032(6) | - |
| Largest diff. peak and hole (eÅ-3) | +0.321/-0.298 | +0.687/-0.372 | +0.268/-0.348 | +0.324/-0.311 | +0.293/-0.341 |
| (*Δ*/*σ*)*max* | 0.000 | 0.000 | 0.001 | 0.000 | 0.000 |


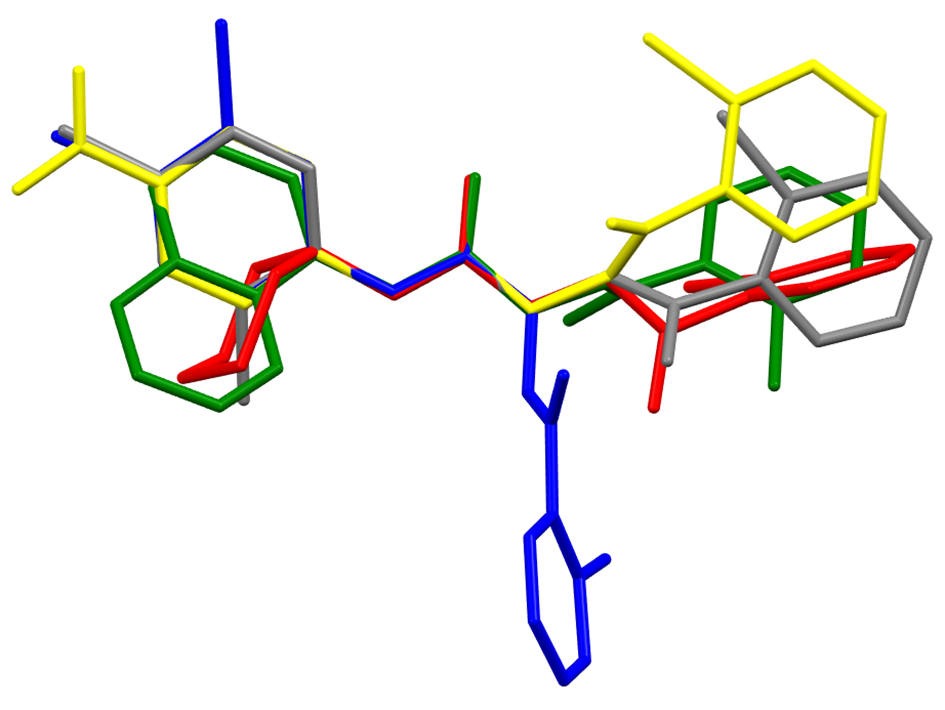


**Fig.S1.** Overlay of X-ray molecules of **AW8** (grey), **AW12** (blue), **AW19** (yellow), **AW23** (green) and **AW33** (red) by least-squares fitting of the C21, N1, C2 and N4 atoms. The H atoms and the disordered benzene ring B of **AW8** and **AW12** are omitted.

*Table S2 Characteristic IR frequencies and assignments for AWs tested.*

| Type and origin of vibrations* | AW8 | AW12 | AW 19 | AW23 | AW33 | AW38 |
| --- | --- | --- | --- | --- | --- | --- |
| Location of bands [cm−1] | | | | | |
| νas(N–H) | 3317 | 3310 | 3335 | 3359 | 3343 | 3383-3196 |
| νs(N–H) | 3198 | - | 3210 | 3177 | 3102 | 3196 |
| ν (C–H (ν) | 3105, 3021, 2902 | 2933 | 3097, 3023 | 3012 | 2929-2859 | 3010 |
| ν(C=O) | 1704 | - | 1715 | 1715 | - | 1708 |
| ν(C=O),  δ(N–H) | - | 1688, 1665 | 1648 | 1635 | 1689 | 1652 |
| ν(C=N) , C=C (ν) | 1612, 1583, 1525 | 1580, 1522 | 1613,1594, 1560 | 1595,1544 | 1549 | 1592-1524 |
| νas(N–N) | 1457 | 1473 | 1456 | 1471 | 1484 | 1432 |
| ν(C–N), ν(N–N) | 1299, 1225 | 1297,1230 | 1300,1225 | 1231 | - | 1289-1253 |
| ν(C–N), ν(N–N) | 1243 | 1243 | 1264 | 1259 | 1242 | 1253 |
| δ(C–H) (aromatic, pos.meta) | 900–860 | - | - | - | - | - |
| δ(C–H) (aromatic, pos.orto) | - | 765-742 | - | - | - | - |
| ν(C–Cl) | 810–720 | 821-742 | 726 | 789-763 | 769 | 897 |
| ν(C–NO2) | - | - | 852-835 | - | - | - |
| δ(C–H) | 780–740 | 765-742 | 765-748 | - | 769 | 769 |

** ν - stretching vibration, δ - deformation vibration, s - symmetrical, as – asymmetrical*


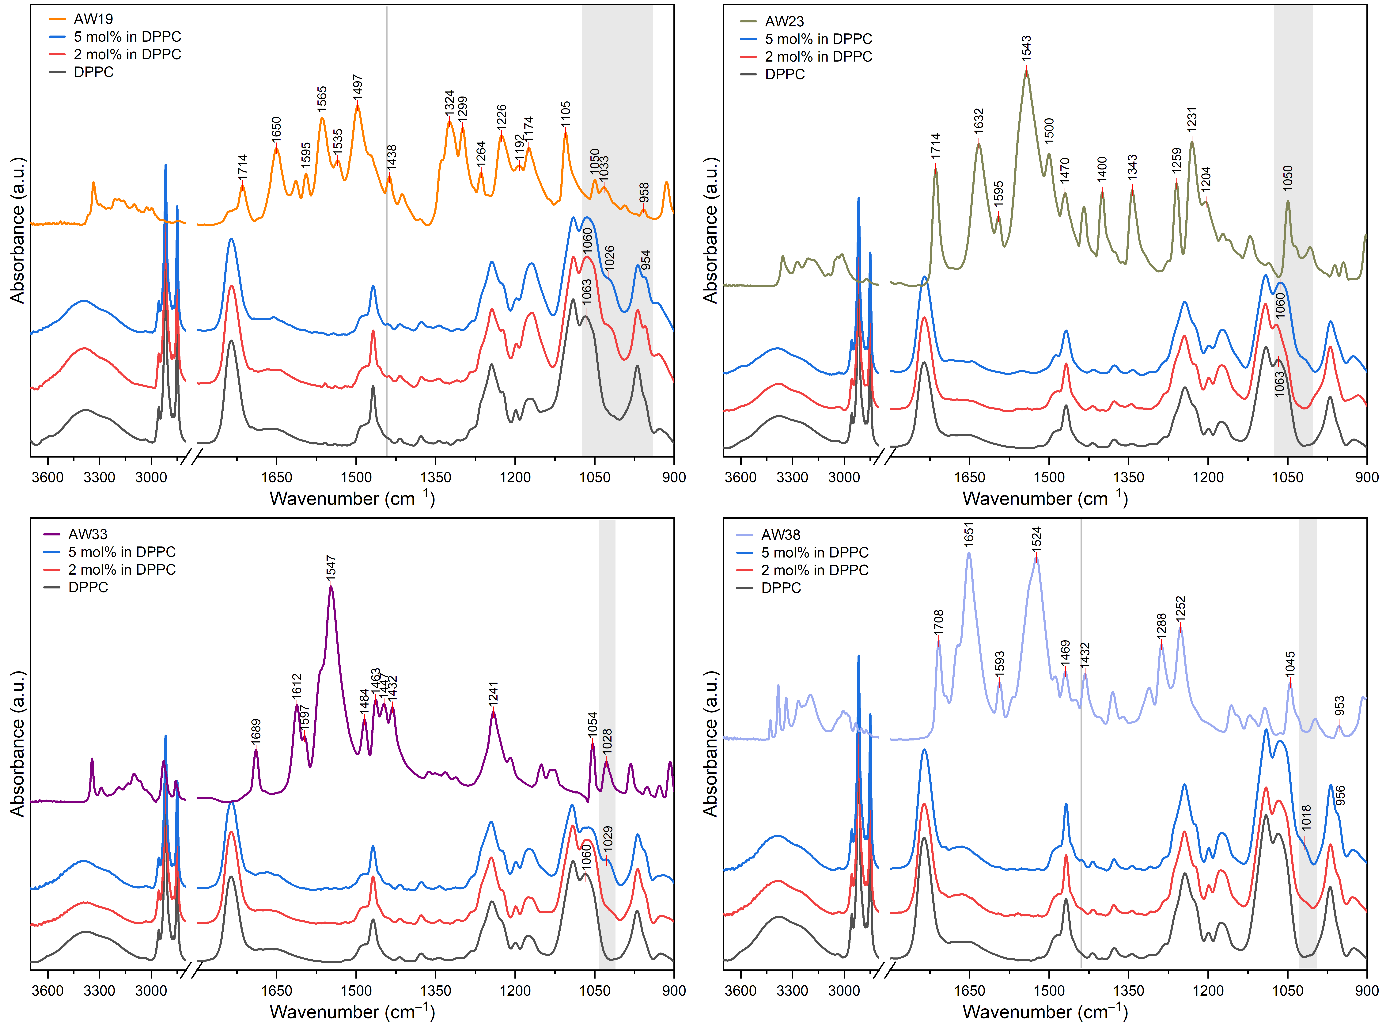


**Fig. S2.** The ATR-FTIR spectra of **AW19, AW23, AW33 and AW38** series dissolved in DMSO in the form of the dry film from the top for 2 and 5 and AW in DPPC, and pure DPPC (black line) at room temperature. Spectra were offset on the vertical scale for clarity. The multibilayers were equilibrated at 1% RH.
